# Supplementary material for: Way out there: pathogens, health, and condition of overwintering salmon in the Gulf of Alaska
Source: Atypon-hosted journal article supplement (doi:10.1139/facets-2021-0052), 2022-01-01
Supplement: facets-2021-0052_supplement1.pdf [file facets-2021-0052_supplement1.pdf]

# Supplementary Materials

Supplementary Table 1: Sampling stations. Location, date, and number of salmon processed at sampling stations during the Gulf of Alaska winter expedition.

Supplementary Table 2. Novel putative viral contigs discovered through metatranscriptomic sequencing

Supplementary Table 3: Infectious agent prevalences in the Gulf of Alaska winter 2019

Supplementary Table 4. Changes in oceanographic variables experienced by salmon. Maximal and mean changes in oceanographic variables between sampling stations were calculated per km and in percent. Then, the values were multiplied by the daily net distance travel of 15.1 km of salmon in the area to derive the daily changes per variable experienced by the salmon:

$0.795 \text{ body length s}^{-1}$  (average speed) \* 0.529 (gross to net distance conversion) \* 415mm (mean length of salmon in study) \* 24h = 15.1 km. Swim speed and conversion factor are based on Ogura and Ishida, 1992 and 1995. See Table 3 for abbreviations.

Supplementary Figure 1: Survey locations and salmon catches during the 2019 Gulf of Alaska Expedition. Locations where no salmon were caught are denoted by "x".

Supplementary Figure 2: Fish health samples from all species were taken from salmon that are representative subsamples (blue: "Fish\_health") of all salmon (red: "All") caught during the 2019 Gulf of Alaska expedition. Fulton's body condition factor K of salmon caught during the 2019 Gulf of Alaska expedition.

Supplementary Figure 3: Number of infectious agents and pathogens (A) and Shannon Weaver diversity (B) of infectious agents and pathogens by species.  $n(\text{chum}) = 84$ ,  $n(\text{coho}) = 80$ ,  $n(\text{pink}) = 27$ ,  $n(\text{sockeye}) = 61$ .

Supplementary Figure 4: Histopathology of high load individuals from the GoA for *Ichthyophonus hoferi* and *Loma* sp.. (a): Coho salmon heart: multiple granulomatous

inflammatory foci due to *I. hoferi* infection (arrows), localized in all the compartments of the heart. (H&E - Scale bar 500  $\mu$ m). (b): Coho salmon heart: same field as (a). *I. hoferi* marked by ISH (red) inside the granulomata observed in the heart. (ISH - Scale bar 500  $\mu$ m). (c): Sockeye gills: *Loma* sp. xenoma (arrow). (H&E - Scale bar 100  $\mu$ m). (d): Coho gills: *Loma* sp. xenomas (arrows). (H&E - Scale bar 100  $\mu$ m)

Supplementary Figure 5: Statistically significant covaried metadata with gene expression clusters in chum salmon. Covariance was tested with anova and differences between groups was assessed with t-test (  $p < 1e-04$ : "\*\*\*\*\*",  $p < 0.001$ : "\*\*\*\*",  $p < 0.01$ : "\*\*\*",  $p < 0.05$ : "\*\*" ).

Supplementary Figure 6: Statistically significant covaried metadata with gene expression clusters in sockeye salmon. Covariance was tested with anova and differences between groups was assessed with t-test (  $p < 1e-04$ : "\*\*\*\*\*",  $p < 0.001$ : "\*\*\*\*",  $p < 0.01$ : "\*\*\*",  $p < 0.05$ : "\*\*" ).

Supplementary Figure 7: Statistically significant covaried metadata with gene expression clusters in coho salmon. Covariance was tested with anova and differences between groups was assessed with t-test (  $p < 1e-04$ : "\*\*\*\*\*",  $p < 0.001$ : "\*\*\*\*",  $p < 0.01$ : "\*\*\*",  $p < 0.05$ : "\*\*" ).

Supplementary Figure 8: Statistically significant covaried metadata with gene expression clusters in pink salmon. Covariance was tested with anova and differences between groups was assessed with t-test (  $p < 1e-04$ : "\*\*\*\*\*",  $p < 0.001$ : "\*\*\*\*",  $p < 0.01$ : "\*\*\*",  $p < 0.05$ : "\*\*" ).

Supplementary Figure 9: Gene expression analysis of salmon captured in the Gulf of Alaska during the winter 2019. (a), (b): chum, (c), (d): sockeye, (e), (f): coho, (g), (h): pink. PCA plot of gene expression is overlaid with meta-data (infectious agents, intrinsic variables, and environmental metadata). Dots depict individual salmon. Vectors show superimposed data correlating with differential gene expression. Only data with a correlation significance of  $p < 0.05$  are shown. Gene names depict the top 20% of genes for ordination (italics) and top 20% of genes correlating with superimposed data (bold). Biomarker panel is indicated by the color of the gene acronym. For a full list of all genes and corresponding factors see Table 1 and 2.

Supplementary Figure 10: Spatial correlation of mean relative infection burden (RIB) at site of capture with temperature and primary prey of salmon species in the Gulf of Alaska during the winter 2019.

Supplementary Figure 11: Changes in oceanographic variables experienced by salmon. Observed oceanographic gradients across the study area with circles around the sampling sites indicating the area the samples salmon could have travelled from within the past 24h based on data by Ogura and Ishida, 1992 and 1995. Radius of the circle is 15.1km and represents the net 24h travel distance of salmon in the study area.

Supplementary materials: Histopathology

Supplementary Table 1: Sampling stations. Location, date, and number of salmon processed at sampling stations during the Gulf of Alaska winter expedition.

| Station | Lat  | Long   | Date      | Sockeye | Pink | Coho | Chum |
|---------|------|--------|-----------|---------|------|------|------|
| 1       | 48.4 | -128.5 | 19-Feb-19 | 0       | 0    | 0    | 0    |
| 2       | 48.4 | -130   | 19-Feb-19 | 0       | 0    | 0    | 0    |
| 3       | 47.4 | -137   | 21-Feb-19 | 0       | 1    | 1    | 0    |
| 4       | 47.4 | -138.5 | 22-Feb-19 | 0       | 8    | 0    | 0    |
| 5       | 47.4 | -140   | 22-Feb-19 | 0       | 0    | 6    | 2    |
| 6       | 47.4 | -141.5 | 23-Feb-19 | 0       | 3    | 0    | 2    |
| 7       | 47.4 | -143   | 23-Feb-19 | 0       | 0    | 0    | 0    |
| 8       | 47.4 | -144.5 | 24-Feb-19 | 0       | 0    | 10   | 0    |
| 9       | 47.4 | -146   | 24-Feb-19 | 0       | 0    | 0    | 1    |
| 10      | 47.4 | -147.5 | 24-Feb-19 | 0       | 0    | 4    | 1    |
| 11      | 48.4 | -147.5 | 25-Feb-19 | 6       | 0    | 2    | 1    |
| 12      | 49.4 | -147.5 | 25-Feb-19 | 1       | 0    | 0    | 2    |
| 13      | 50.4 | -147.5 | 25-Feb-19 | 1       | 0    | 0    | 1    |
| 14      | 51.4 | -147.5 | 26-Feb-19 | 0       | 0    | 1    | 0    |
| 15      | 52.4 | -147.5 | 26-Feb-19 | 0       | 0    | 1    | 0    |
| 16      | 53.4 | -147.5 | 26-Feb-19 | 6       | 0    | 0    | 2    |
| 17      | 54.4 | -147.5 | 27-Feb-19 | 1       | 0    | 0    | 2    |
| 18      | 55.4 | -147.5 | 27-Feb-19 | 0       | 0    | 0    | 0    |
| 19      | 56.4 | -147.5 | 28-Feb-19 | 0       | 0    | 0    | 1    |
| 20      | 56.4 | -146   | 28-Feb-19 | 0       | 0    | 0    | 0    |
| 21      | 56.4 | -144.5 | 28-Feb-19 | 0       | 0    | 0    | 0    |
| 22      | 56.4 | -143   | 28-Feb-19 | 10      | 0    | 0    | 0    |
| 23      | 55.4 | -143   | 01-Mar-19 | 0       | 0    | 0    | 1    |
| 24      | 55.4 | -144.5 | 01-Mar-19 | 0       | 0    | 1    | 0    |
| 25      | 55.4 | -146   | 01-Mar-19 | 9       | 0    | 0    | 1    |
| 26      | 54.4 | -146   | 02-Mar-19 | 2       | 0    | 0    | 2    |
| 27      | 53.4 | -146   | 02-Mar-19 | 4       | 0    | 0    | 2    |
| 28      | 52.4 | -146   | 02-Mar-19 | 2       | 0    | 0    | 2    |
| 29      | 51.4 | -146   | 03-Mar-19 | 0       | 0    | 0    | 4    |
| 30      | 50.4 | -146   | 03-Mar-19 | 0       | 0    | 0    | 9    |
| 31      | 49.4 | -146   | 03-Mar-19 | 0       | 0    | 4    | 3    |
| 32      | 48.4 | -146   | 04-Mar-19 | 0       | 5    | 2    | 3    |
| 33      | 48.4 | -144.5 | 04-Mar-19 | 0       | 5    | 5    | 0    |
| 34      | 49.4 | -144.5 | 04-Mar-19 | 4       | 1    | 0    | 2    |
| 35      | 50.4 | -144.5 | 05-Mar-19 | 0       | 1    | 0    | 9    |
| 36      | 51.4 | -144.5 | 05-Mar-19 | 0       | 1    | 0    | 8    |
| 37      | 52.4 | -144.5 | 05-Mar-19 | 6       | 0    | 1    | 1    |
| 38      | 53.4 | -144.5 | 06-Mar-19 | 0       | 0    | 0    | 4    |
| 39      | 54.4 | -144.5 | 06-Mar-19 | 0       | 0    | 0    | 1    |
| 40      | 54.4 | -143   | 06-Mar-19 | 1       | 0    | 0    | 0    |

|    |      |        |           |   |   |    |   |
|----|------|--------|-----------|---|---|----|---|
| 41 | 53.4 | -143   | 07-Mar-19 | 0 | 0 | 0  | 0 |
| 42 | 52.4 | -143   | 07-Mar-19 | 0 | 0 | 0  | 1 |
| 43 | 51.4 | -143   | 07-Mar-19 | 0 | 0 | 2  | 4 |
| 44 | 50.4 | -143   | 08-Mar-19 | 0 | 0 | 0  | 9 |
| 45 | 49.4 | -143   | 08-Mar-19 | 0 | 2 | 7  | 0 |
| 46 | 48.4 | -143   | 09-Mar-19 | 1 | 0 | 9  | 0 |
| 47 | 48.4 | -141.5 | 09-Mar-19 | 0 | 0 | 3  | 0 |
| 48 | 49.4 | -141.5 | 09-Mar-19 | 1 | 0 | 10 | 0 |
| 49 | 50.4 | -141.5 | 10-Mar-19 | 1 | 0 | 6  | 0 |
| 50 | 51.4 | -141.5 | 10-Mar-19 | 0 | 0 | 0  | 0 |
| 51 | 52.4 | -141.5 | 10-Mar-19 | 0 | 0 | 2  | 0 |
| 52 | 53.4 | -141.5 | 11-Mar-19 | 3 | 0 | 1  | 1 |
| 53 | 53.4 | -140   | 11-Mar-19 | 0 | 0 | 0  | 0 |
| 54 | 52.4 | -140   | 12-Mar-19 | 5 | 0 | 1  | 0 |
| 55 | 51.4 | -140   | 12-Mar-19 | 0 | 0 | 0  | 0 |
| 56 | 50.4 | -140   | 13-Mar-19 | 0 | 0 | 0  | 0 |
| 57 | 50.4 | -138.5 | 13-Mar-19 | 0 | 0 | 0  | 0 |
| 58 | 49.4 | -138.5 | 14-Mar-19 | 0 | 0 | 0  | 0 |
| 59 | 48.4 | -138.5 | 14-Mar-19 | 0 | 0 | 0  | 0 |
| 60 | 48.4 | -137   | 15-Mar-19 | 0 | 0 | 0  | 0 |

Supplementary Table 2. Novel putative viral contigs discovered through metatranscriptomic sequencing

| Putative virus name                       | Assay name | Host of sequencing library | Contig for which assay was designed                                                                                                                                                                                                                                                                                                                                                                                                                                                                                                  | Genbank accession of contig | Top Blast hit                                                                 | Amino acid identity |
|-------------------------------------------|------------|----------------------------|--------------------------------------------------------------------------------------------------------------------------------------------------------------------------------------------------------------------------------------------------------------------------------------------------------------------------------------------------------------------------------------------------------------------------------------------------------------------------------------------------------------------------------------|-----------------------------|-------------------------------------------------------------------------------|---------------------|
| Putative bafini virus                     | Bafini_b   | Chinook                    | TCTTGTGTTTTGATTTCATCACTTAGAAAATGTTGAA<br>GGATCAGTGGGTTGGTCACATTCATCGAAGAGAGATGT<br>TCTAGTGATAATGCCGACTGAAGTTGGCATTTCACACA<br>TGAATGAAAGAGTGGTATTTAATTAACGTAGCTTGATG<br>GTCAATAAGGGCCAGCGACATGCCCTGTGACATGATTT<br>CACACATTACTTTAACTGAAGGCCTGATAAGCAATGGT<br>AGAGCTTTGAAGGATCTTGTGGGTACAGCTAAGC                                                                                                                                                                                                                                        | MW373508                    | White bream virus strain DF24/00, complete genome                             | 53%                 |
| Putative circo virus                      | Circo      | Chinook                    | CGAGAAGTCCCCACCACCAAGAATAACATTGGCAGT<br>GCATGGGCATTGTGCGAAAAACATAACTTTGAAACAA<br>GCCATTGCGGTATTGCCAATGCACACTTGGAGCCCTC<br>TAAATGTGAAGCCCTCGATGCCTACGTATGAAAAAAG<br>AGACGAGGATCGAGGGCTCTACATTTGAAGTCGGAAA<br>GAGGCCATTTAAGATGAACTAAAAACGGACTGGGCAG<br>CAATGAGACCGACCTTGC                                                                                                                                                                                                                                                              | MW373509                    | Circoviridae 18 LDMD-2013, complete genome                                    | 48%                 |
| Putative hantavirus                       | Hantavirus | Chinook                    | CAGGAATTGAGGTCAGGGACTGCAAAGGAATCTCAGG<br>GACCTCAATGGGAACAGTGTGCAGTGTACAGTGATGT<br>GCAGCGGGCCAACTCATGCGGATGTCTCAGCCCTGT<br>ACAAAGAGACTTGCTGTGTGGAGAAGAGACTATGATTG<br>CATTACCCGCAACAAGCCAGGACCAAGAGGTGTTCTCG<br>TGTGGAGAAAGGAGACAACGGCAAGCTGGACCTTG<br>AGATCGTGATGTTGGGATCGAAACCGCTGTGATAGGA<br>GCAGCCACAATGGGGCGGTTGAAGCCTTAACTGGGC<br>TTAAGCCATGGGAGCTTGGCCTTGAATAGGAGGAGG<br>CCTTGACGAGTGTCTCCTTGCCTGATTGTCATCTCTG<br>TGGTCTATGTAAGGCTAAGCAAAAAAGAAAAAAGA<br>GATGACTGAGAAGCCGATTAAGTCCGAAGGTTTATAA<br>ACACCGGAAGGAACTATAAATCAAACAAG | MW373510                    | Wenling red spikefish hantavirus                                              | 43%                 |
| Pacific salmon nidovirus sequence variant | Nido2_a    | Chinook                    | GATATCAACAACACTACCTCCAGAGGAGACAGTAGTAGCG<br>ATGTCCACCATTGCCTCAATGTGCACACCCCTGCAACA<br>ACACCCCTCCAGTCCCTTCTACGGTGTCTATCAATTCAAC<br>ACCCCGAAAGAAACACCTACATTTTGTAGGAACACT<br>ACCACCGCTCTACCTGAAAGCTCCAGTTCCCTCAGCTG<br>AAGTTCGCACACCTGATGCAGTTACGGAATTCATTCTG<br>CCTGCAATACCAGATTCCCGAG                                                                                                                                                                                                                                                 | MW373511                    | Pacific salmon nidovirus isolate                                              | 77%                 |
| Putative picorna virus                    | Picorna2   | Chinook                    | CTATTGGTCAACCCATCTTTCAACAATTACAAGCAGTGT<br>CTTGTGCTATGAAATCCGCACGCCATATTCGAGGT<br>ATTGATGTGACGTTGTAGACTCAACTCAGACTCCATTT<br>CTTGGTGACGTTTCTGACTTGTGTTTCGTTCTCAGAAATAG<br>GACAGGGATTGGGAATACTAGCGCTCCTTCTACCTCT<br>ATGAGGGCGCAGGCGATGATTTCAATTTCTTCTCATG<br>GTCGGTCCACCACCTATGATGGACATCAAGAAATGTGAA<br>GAATGTCTTCTTCCCACTGGAACGTCCCGTTCCG<br>TGGACCTTGCTG                                                                                                                                                                             | MW373512                    | Halhan virus 1 replicative protein and structural protein genes, complete cds | 68%                 |
| Putative Qin-like virus                   | Qin        | Chinook                    | AAAAGTGCCAAACTATTCTATCCCGTTATAGACGCCG<br>ACAATCGTGAGTTATACAGTCTATCCATATGATCGGG<br>CACTGGGCCTACTACCTCAGCTCAGAAAGCTAGG<br>CTTCTCAAGTGTGTTGGATGTTACACCTTACGTTGAAGG<br>CTATGACTTCGCAGTGCCTGAGGACATAAACTTAGATT<br>GTCGGGACACCAGCCGGCACGGCAAAGGCCTACGTT<br>GCTCATGCGAGTTAAAAAGGCTTATTCATAGTGGTCTC<br>ACCGGTTTAC                                                                                                                                                                                                                            | MW373513                    | Sanxia Qinvirus-like virus 1 strain                                           | 39%                 |
| Putative rhabdo virus                     | Rhabdo3    | Chinook                    | TCTTCCAATTCATCATTGTTTCTAACTGTTGTTGCTTAT<br>AATGAGTGCATATAACTTGATTATCTCCTTGAGCTAGCA<br>CTTTCACCACAGTATTCCTGACTGCTGATTCTCTTTTA<br>TGACTAAAAGATTCAATATGCTCCAACCTTTTTGCTCA<br>ATCCTTCTAATCCACCTTTCTGTCCATCCCG                                                                                                                                                                                                                                                                                                                            | MW373514                    | Spring Viremia of Carp complete genome                                        | 79%                 |

Supplementary Table 3: Infectious agent prevalences in the Gulf of Alaska winter 2019

| Species | Pathogen                                      | Type      | Prevalence |
|---------|-----------------------------------------------|-----------|------------|
| Chum    | <i>Candidatus</i> Branchiomonas cysticola     | Bacterium | 56%        |
|         | <i>Candidatus</i> Synngnamydia salmonis (Sch) | Bacterium | 6%         |
|         | <i>Ceratanova shasta</i>                      | Parasite  | 10%        |
|         | <i>Ichthyobodo</i> sp.                        | Parasite  | 21%        |
|         | <i>Ichthyophonus hoferi</i>                   | Parasite  | 29%        |
|         | <i>Loma</i> sp.                               | Parasite  | 50%        |
|         | <i>Myxobolus insidiosus</i>                   | Parasite  | 1%         |
|         | <i>Parvicapsula kabatai</i>                   | Parasite  | 2%         |
|         | <i>Parvicapsula pseudobranchicola</i>         | Parasite  | 26%        |
|         | <i>Sphaerothecum destruens</i>                | Parasite  | 1%         |
|         | Viral encephalopathy and retinopathy virus    | Virus     | 1%         |
| Coho    | <i>Candidatus</i> Branchiomonas cysticola     | Bacterium | 89%        |
|         | <i>Candidatus</i> Synngnamydia salmonis (Sch) | Bacterium | 10%        |
|         | <i>Ceratanova shasta</i>                      | Parasite  | 4%         |
|         | Erythrocytic necrosis virus                   | Virus     | 3%         |
|         | <i>Ichthyobodo</i> sp.                        | Parasite  | 14%        |
|         | <i>Ichthyophonus hoferi</i>                   | Parasite  | 59%        |
|         | <i>Ichthyophthirius multifiliis</i>           | Parasite  | 1%         |

|             |                                                                   |           |     |
|-------------|-------------------------------------------------------------------|-----------|-----|
|             | <i>Kudoa thyrsites</i>                                            | Parasite  | 1%  |
|             | <i>Loma</i> sp.                                                   | Parasite  | 53% |
|             | <i>Myxobolus insidiosus</i>                                       | Parasite  | 4%  |
|             | <i>Nanophyetus salmincola</i>                                     | Parasite  | 1%  |
|             | <i>Paranucleospora theridion</i> / <i>Desmozoon lepeophtherii</i> | Parasite  | 6%  |
|             | <i>Parvicapsula kabatai</i>                                       | Parasite  | 3%  |
|             | <i>Parvicapsula minibicornis</i>                                  | Parasite  | 9%  |
|             | <i>Parvicapsula pseudobranchicola</i>                             | Parasite  | 18% |
|             | Putative rhabdo virus                                             | Virus     | 1%  |
|             | Salmovirus WFRC1                                                  | Virus     | 5%  |
|             | <i>Sphaerothecum destruens</i>                                    | Parasite  | 5%  |
|             | Viral encephalopathy and retinopathy virus                        | Virus     | 36% |
| <b>Pink</b> | <i>Candidatus</i> Branchiomonas cysticola                         | Bacterium | 89% |
|             | <i>Candidatus</i> Synonymydia salmonis (Sch)                      | Bacterium | 4%  |
|             | <i>Ichthyobodo</i> sp.                                            | Parasite  | 30% |
|             | <i>Ichthyophonus hoferi</i>                                       | Parasite  | 37% |
|             | <i>Kudoa thyrsites</i>                                            | Parasite  | 4%  |
|             | <i>Loma</i> sp.                                                   | Parasite  | 19% |
|             | <i>Parvicapsula pseudobranchicola</i>                             | Parasite  | 26% |
|             | <i>Sphaerothecum destruens</i>                                    | Parasite  | 4%  |



|                |                                              |           |     |
|----------------|----------------------------------------------|-----------|-----|
| <b>Sockeye</b> | <i>Candidatus</i> Branchiomonas cysticola    | Bacterium | 59% |
|                | <i>Candidatus</i> Syngnamydia salmonis (Sch) | Bacterium | 11% |
|                | <i>Ichthyobodo</i> sp.                       | Parasite  | 3%  |
|                | <i>Ichthyophonus hoferi</i>                  | Parasite  | 33% |
|                | <i>Ichthyophthirius multifiliis</i>          | Parasite  | 2%  |
|                | <i>Loma</i> sp.                              | Parasite  | 67% |
|                | Pacific salmon parvovirus                    | Virus     | 39% |
|                | <i>Parvicapsula minibicornis</i>             | Parasite  | 2%  |
|                | <i>Parvicapsula pseudobranchicola</i>        | Parasite  | 16% |
|                | Putative -picorna virus                      | Virus     | 2%  |
|                | <i>Sphaerothecum destruens</i>               | Parasite  | 25% |
|                | Viral encephalopathy and retinopathy virus   | Virus     | 2%  |

Supplementary Table 4. Changes in oceanographic variables experienced by salmon. Maximal and mean changes in oceanographic variables between sampling stations were calculated per km and in percent. Then, the values were multiplied by the daily net distance travel of 15.1 km of salmon in the area to derive the daily changes per variable experienced by the salmon:

$0.795 \text{ body length s}^{-1}$  (average speed) \* 0.529 (gross to net distance conversion) \* 415mm (mean length of salmon in study) \* 24h = 15.1 km. Swim speed and conversion factor are based on Ogura and Ishida, 1992 and 1995. See Table 3 for abbreviations.

| Factor    | Unit     | Observed |        | Max. change day <sup>-1</sup> |       | Mean change day <sup>-1</sup> |     |
|-----------|----------|----------|--------|-------------------------------|-------|-------------------------------|-----|
|           |          | Max      | Mean   | Value                         | %     | Value                         | %   |
| TEM       | °C       | 8.27     | 6.40   | 0.13                          | 2%    | 0.03                          | 0%  |
| SAL       | ppt      | 32.67    | 32.46  | 0.03                          | 0%    | 0.00                          | 0%  |
| Chl_Flu   | ppb      | 82.91    | 52.52  | 3.65                          | 5%    | 0.41                          | 1%  |
| DO_p      | %        | 97.61    | 95.47  | 0.66                          | 1%    | 0.04                          | 0%  |
| Zoo_S     | mgWW.m-3 | 48.09    | 16.72  | 2.86                          | 44%   | 0.52                          | 3%  |
| Zoo_M     | mgWW.m-3 | 44.36    | 3.48   | 4.14                          | 532%  | 0.38                          | 11% |
| Zoo_L     | mgWW.m-3 | 727.02   | 108.09 | 82.16                         | 41%   | 5.16                          | 5%  |
| Zoo_total | mgWW.m-3 | 767.33   | 137.03 | 83.04                         | 36%   | 4.30                          | 3%  |
| Cope      | mgWW.m-3 | 283.25   | 72.20  | 20.70                         | 30%   | 2.63                          | 4%  |
| Euphaus   | mgWW.m-3 | 38.65    | 0.86   | 5.24                          | 5244% | 0.25                          | 28% |
| Ptero     | mgWW.m-3 | 3.24     | 0.49   | 0.43                          | 194%  | 0.04                          | 9%  |
| Medu      | mgWW.m-3 | 29.38    | 1.95   | 3.98                          | 3983% | 0.44                          | 23% |
| Chaeto    | mgWW.m-3 | 679.70   | 26.95  | 79.24                         | 2544% | 2.74                          | 10% |

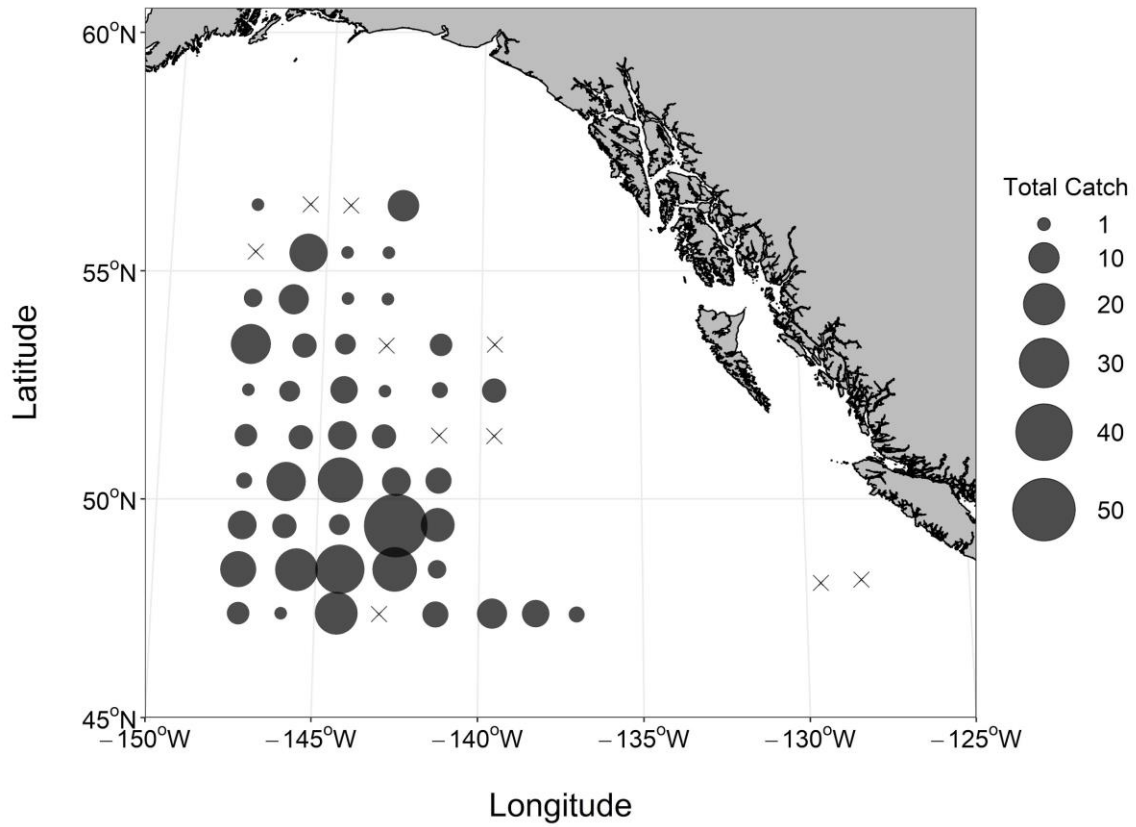

Supplementary Figure 1: Survey locations and salmon catches during the 2019 Gulf of Alaska Expedition. Locations where no salmon were caught are denoted by "x".

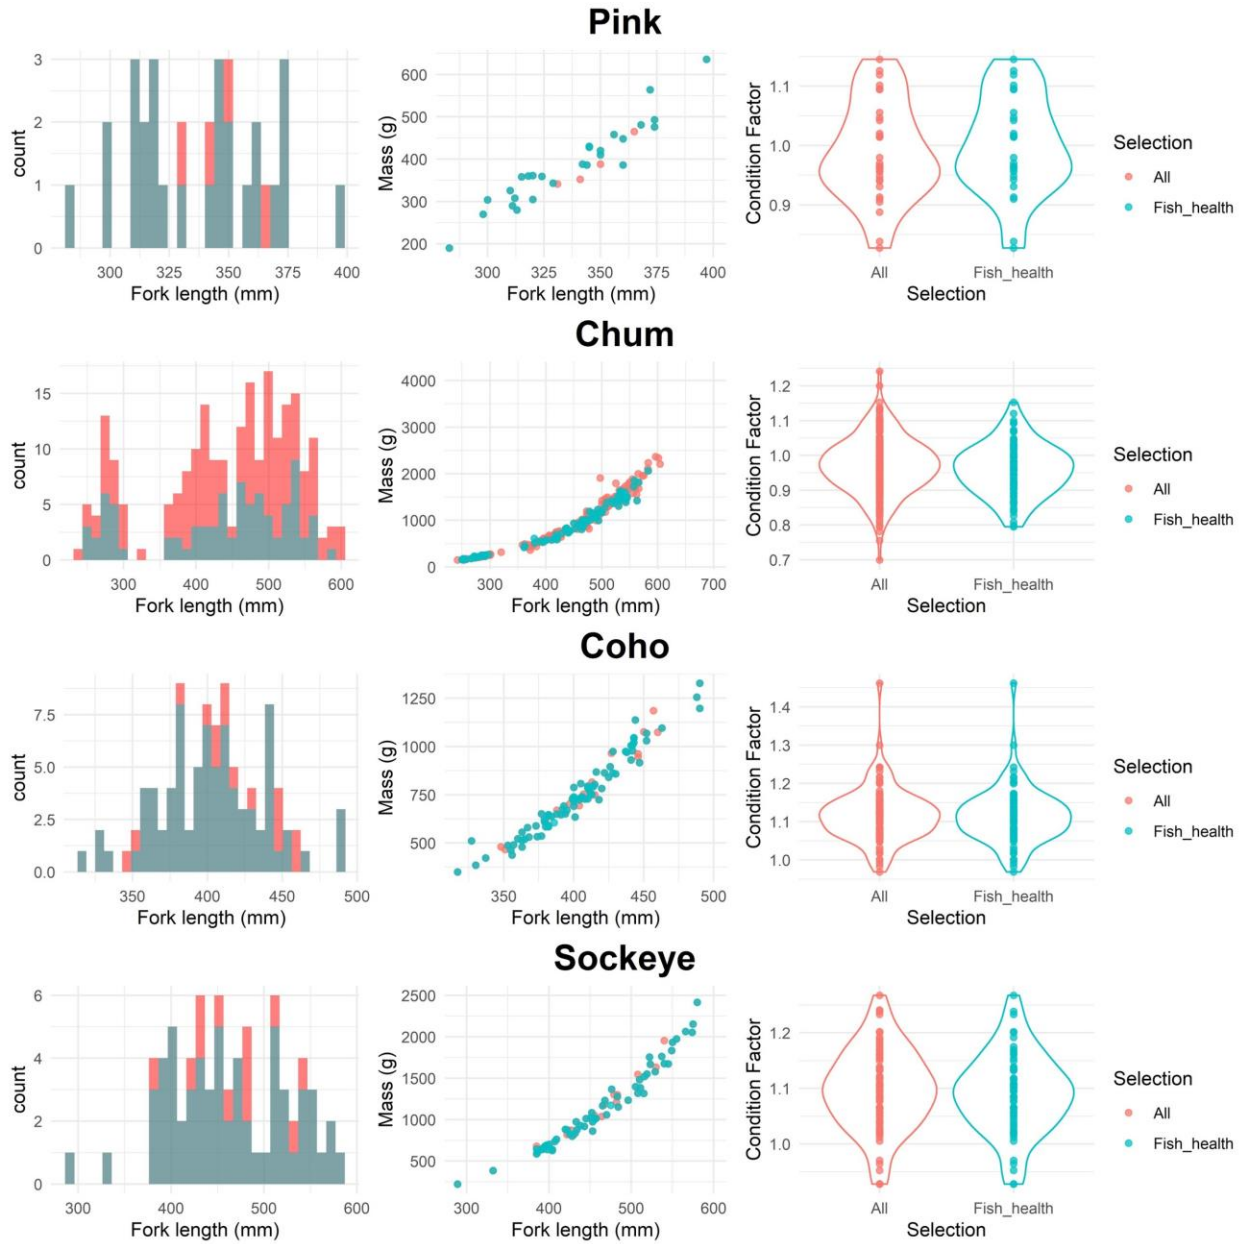

Supplementary Figure 2: Fish health samples from all species were taken from salmon that are representative subsamples (blue: “Fish\_health”) of all salmon (red: “All”) caught during the 2019 Gulf of Alaska expedition. Fulton's body condition factor K of salmon caught during the 2019 Gulf of Alaska expedition.

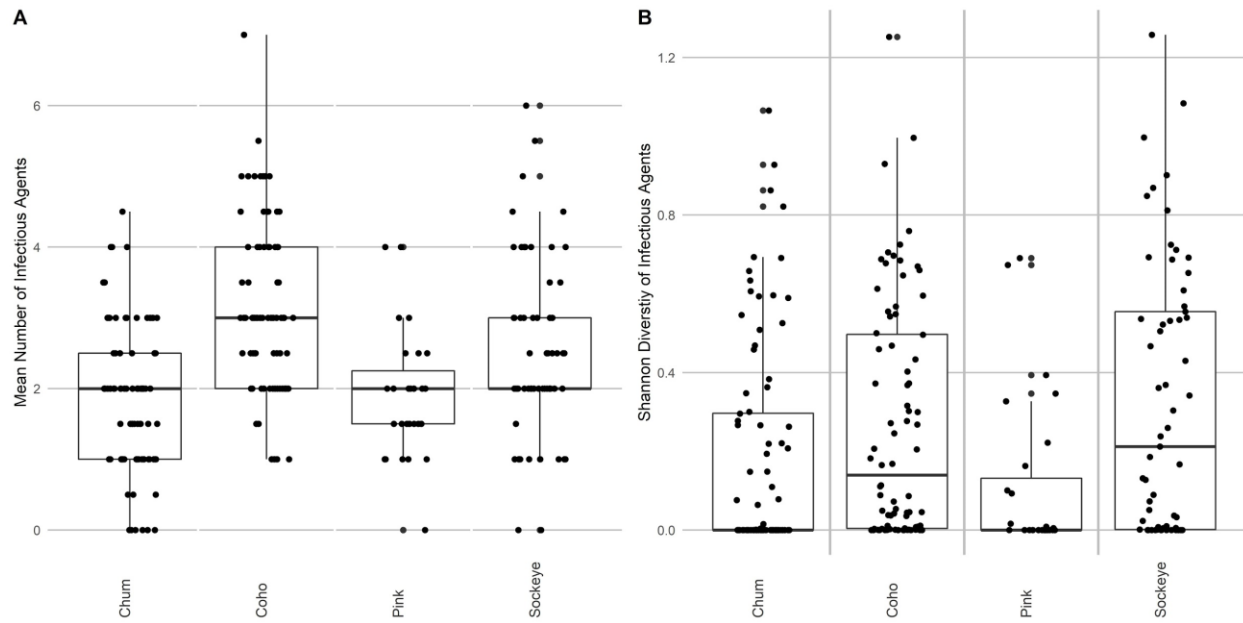

Supplementary Figure 3: Number of infectious agents and pathogens (A) and Shannon Weaver diversity (B) of infectious agents and pathogens by species.  $n(\text{chum}) = 84$ ,  $n(\text{coho}) = 80$ ,  $n(\text{pink}) = 27$ ,  $n(\text{sockeye}) = 61$ .

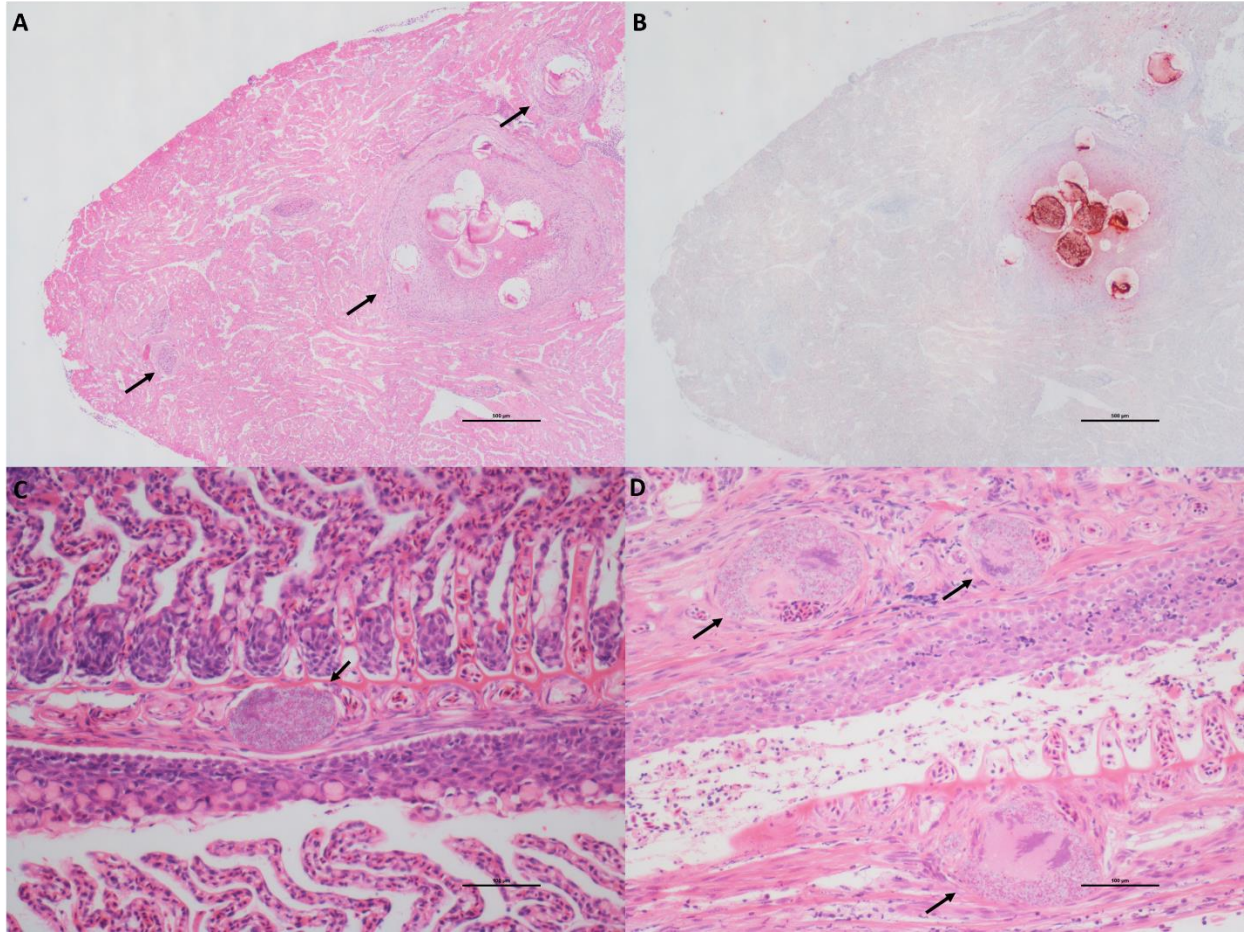

Supplementary Figure 4: Histopathology of high load individuals from the GoA for *Ichthyophonus hoferi* and *Loma* sp.. (a): Coho salmon heart: multiple granulomatous inflammatory foci due to *I. hoferi* infection (arrows), localized in all the compartments of the heart. (H&E - Scale bar 500  $\mu$ m). (b): Coho salmon heart: same field as (a). *I. hoferi* marked by ISH (red) inside the granulomata observed in the heart. (ISH - Scale bar 500  $\mu$ m). (c): Sockeye gills: *Loma* sp. xenoma (arrow). (H&E - Scale bar 100  $\mu$ m). (d): Coho gills: *Loma* sp. xenomas (arrows). (H&E - Scale bar 100  $\mu$ m)

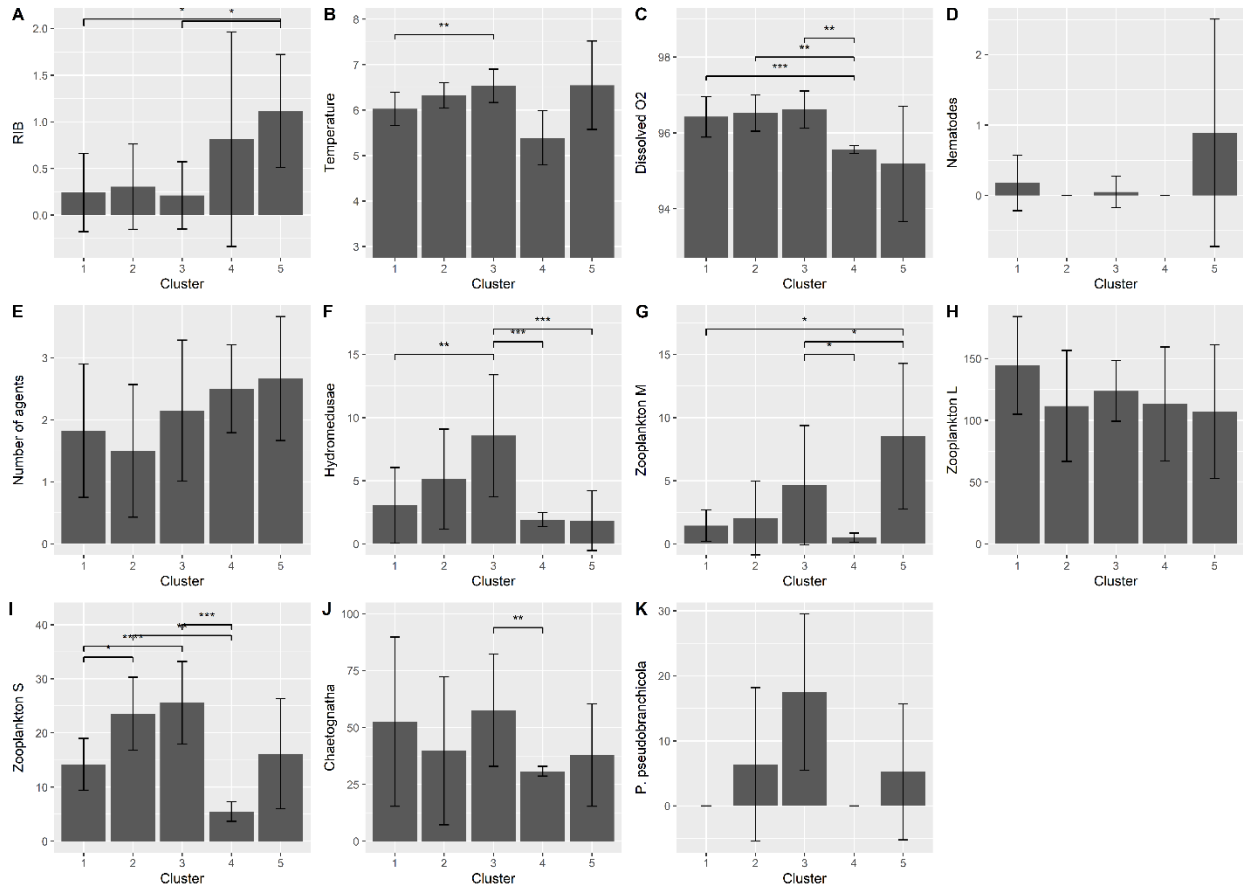

Supplementary Figure 5: Statistically significant covaried metadata with gene expression clusters in chum salmon. Covariance was tested with anova and differences between groups was assessed with t-test (  $p < 1e-04$ : "\*\*\*\*",  $p < 0.001$ : "\*\*\*",  $p < 0.01$ : "\*\*",  $p < 0.05$ : "\*" ).

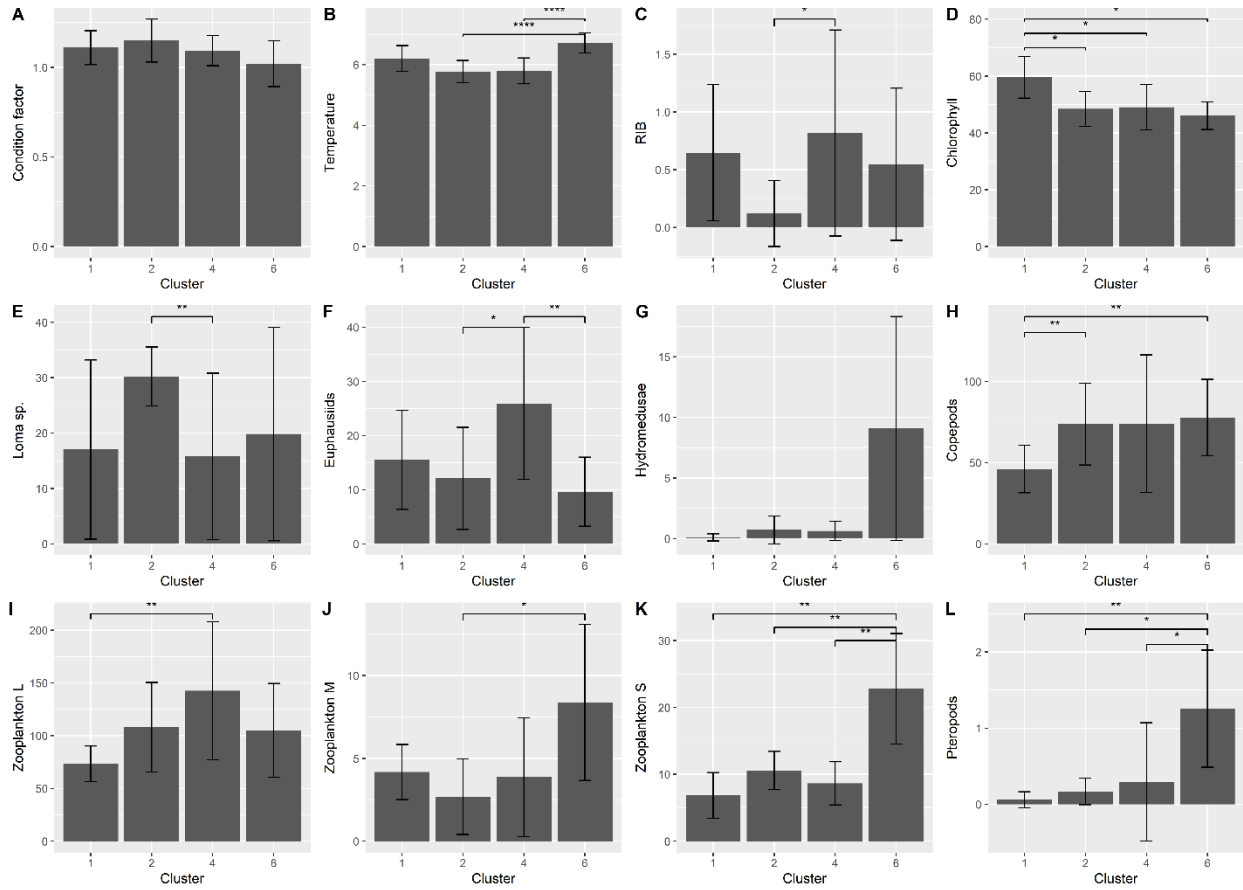

Supplementary Figure 6: Statistically significant covaried metadata with gene expression clusters in sockeye salmon. Covariance was tested with anova and differences between groups was assessed with t-test (  $p < 1e-04$ : "\*\*\*\*",  $p < 0.001$ : "\*\*\*",  $p < 0.01$ : "\*\*",  $p < 0.05$ : "\*" ).



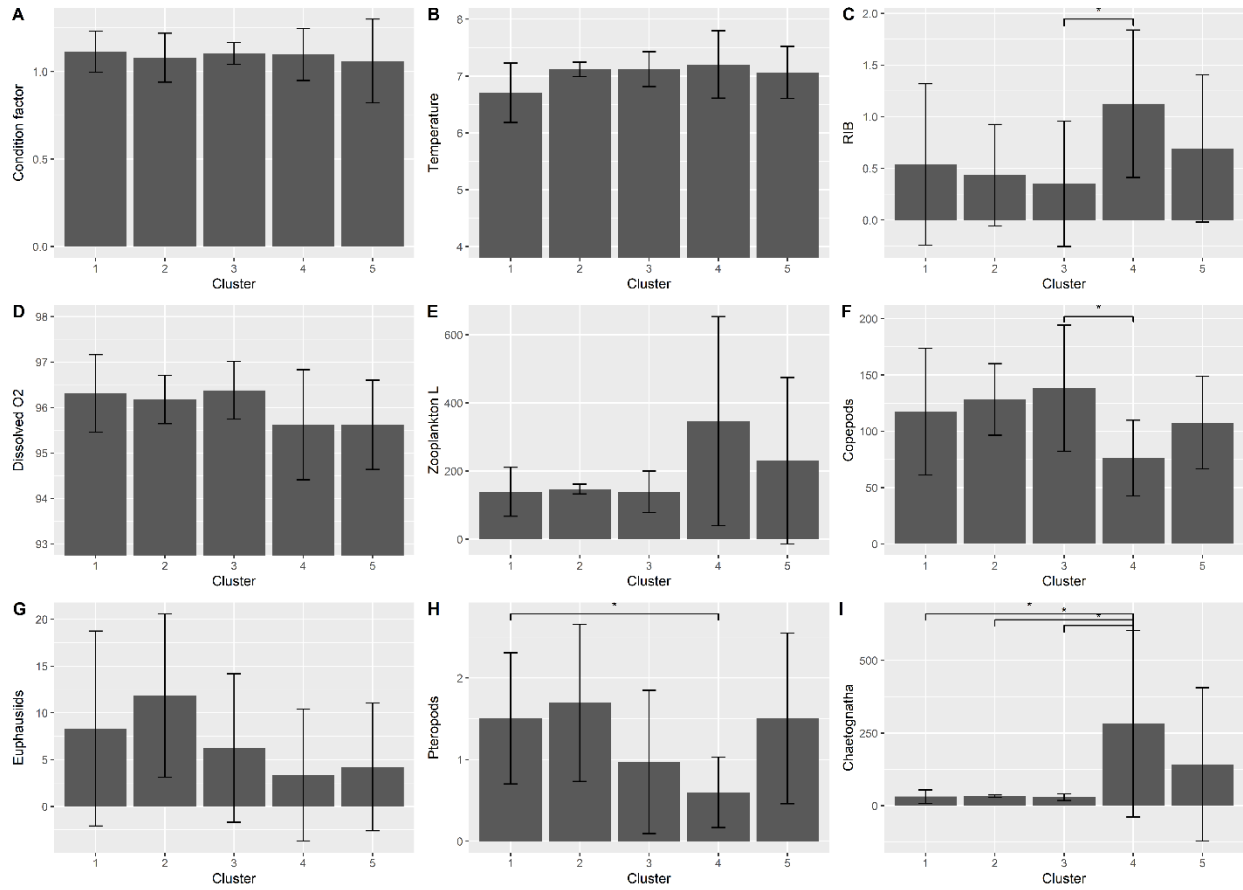

Supplementary Figure 7: Statistically significant covaried metadata with gene expression clusters in coho salmon. Covariance was tested with anova and differences between groups was assessed with t-test (  $p < 1e-04$ : "\*\*\*\*",  $p < 0.001$ : "\*\*\*",  $p < 0.01$ : "\*\*",  $p < 0.05$ : "\*" ).

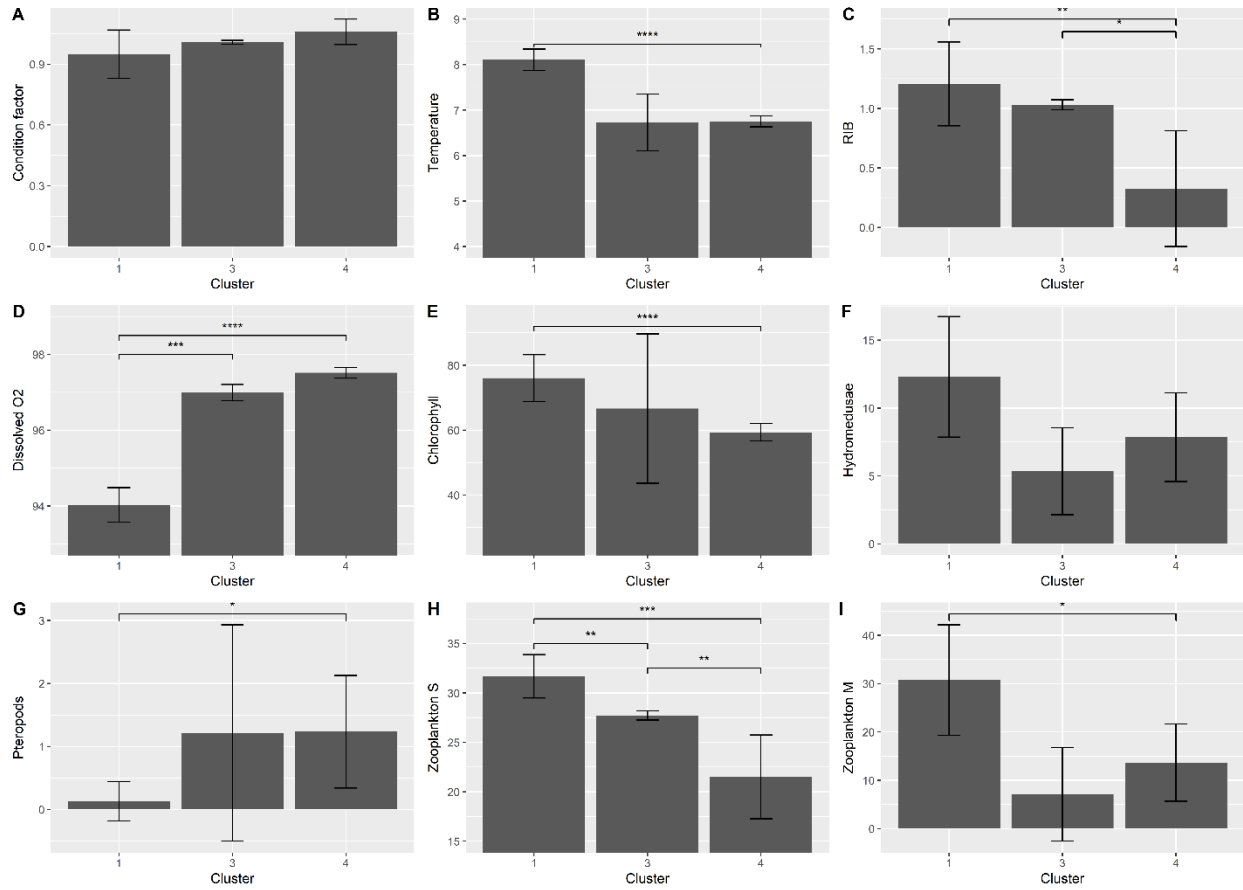

Supplementary Figure 8: Statistically significant covaried metadata with gene expression clusters in pink salmon. Covariance was tested with anova and differences between groups was assessed with t-test (  $p < 1e-04$ : "\*\*\*\*",  $p < 0.001$ : "\*\*\*",  $p < 0.01$ : "\*\*",  $p < 0.05$ : "\*" ).

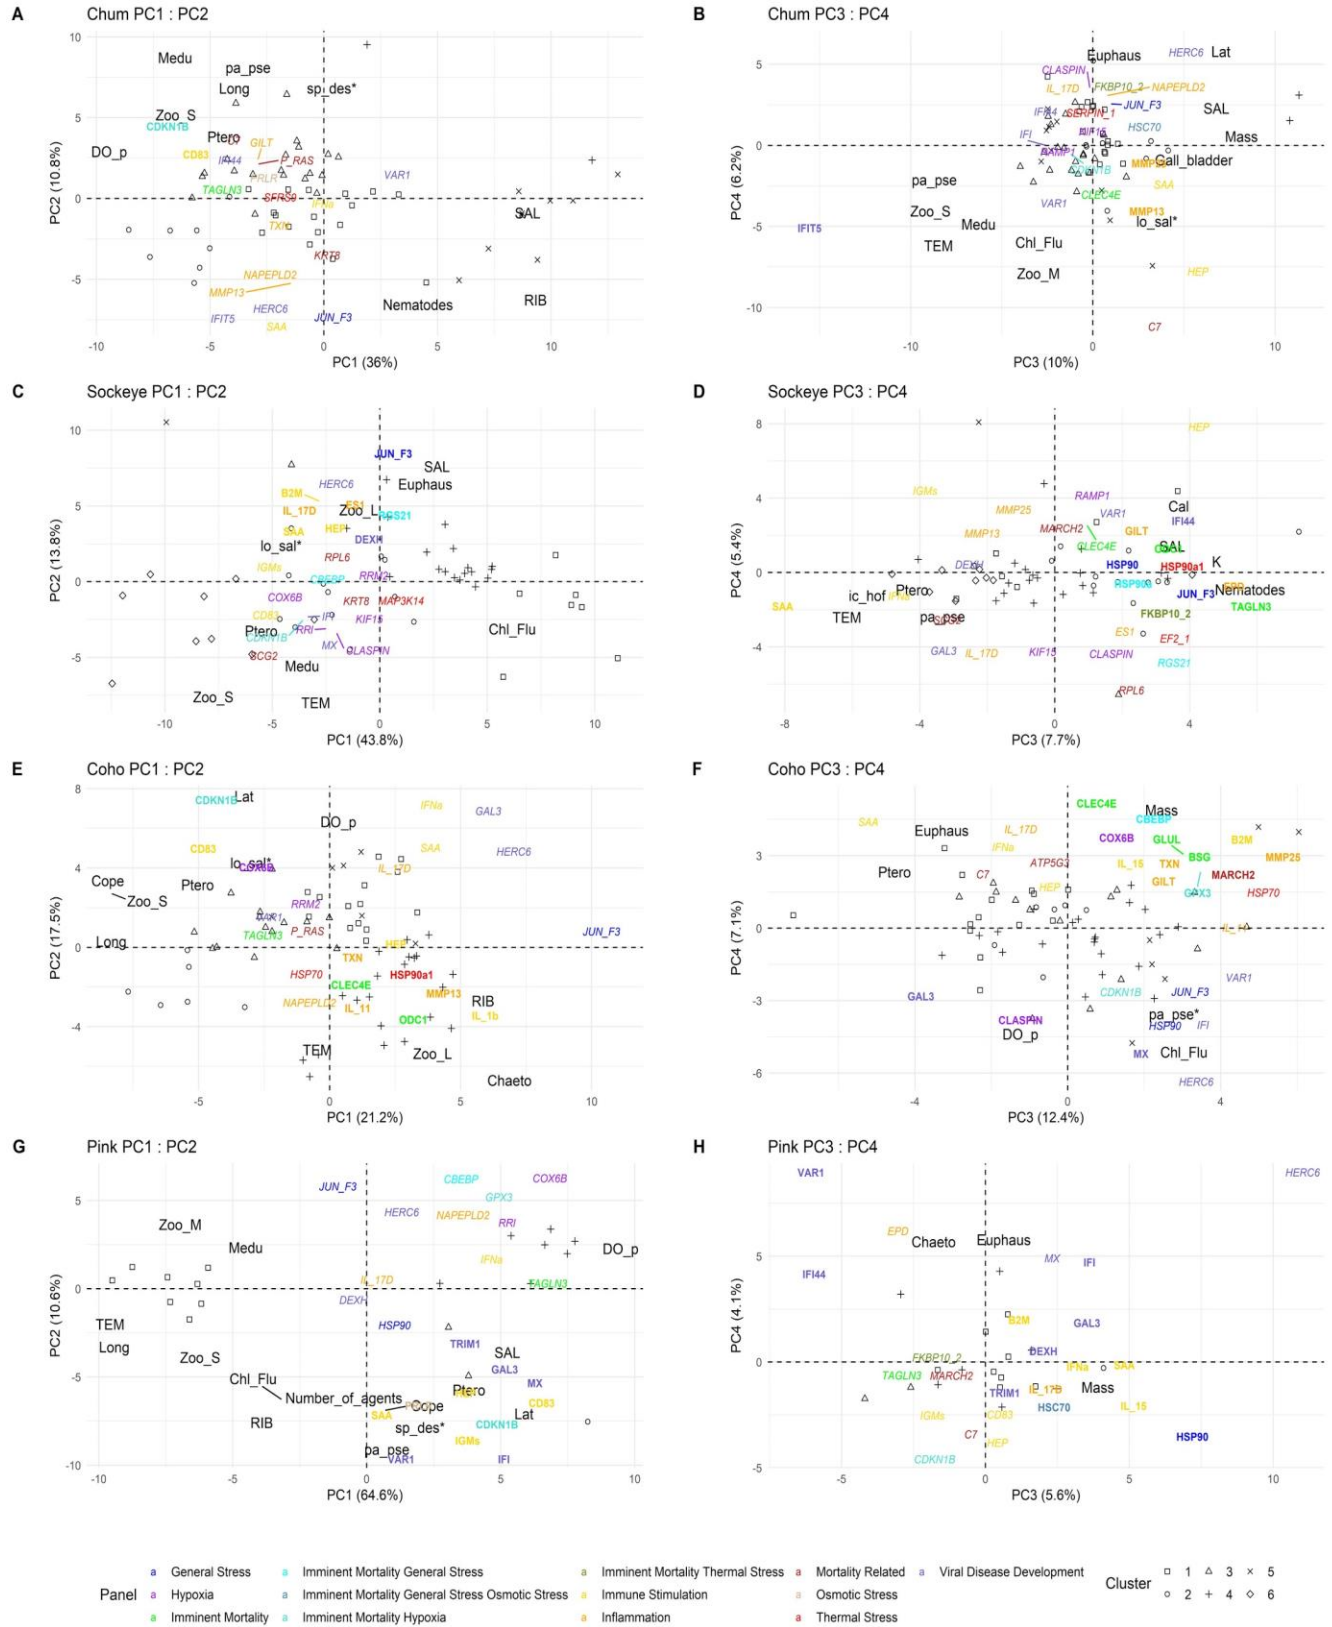

Supplementary Figure 9: Gene expression analysis of salmon captured in the Gulf of Alaska during the winter 2019. (a), (b): chum, (c), (d): sockeye, (e), (f): coho, (g), (h): pink. PCA plot of gene expression is overlaid with meta-data (infectious agents, intrinsic variables, and environmental metadata). Dots depict individual salmon. Vectors show superimposed data correlating with differential gene expression. Only data with a correlation significance of  $p < 0.05$  are shown. Gene names depict the top 20% of genes for ordination (*italics*) and top 20% of genes correlating with superimposed data (**bold**). Biomarker panel is indicated by the color of the gene acronym. For a full list of all genes and corresponding factors see Table 1 and 2.

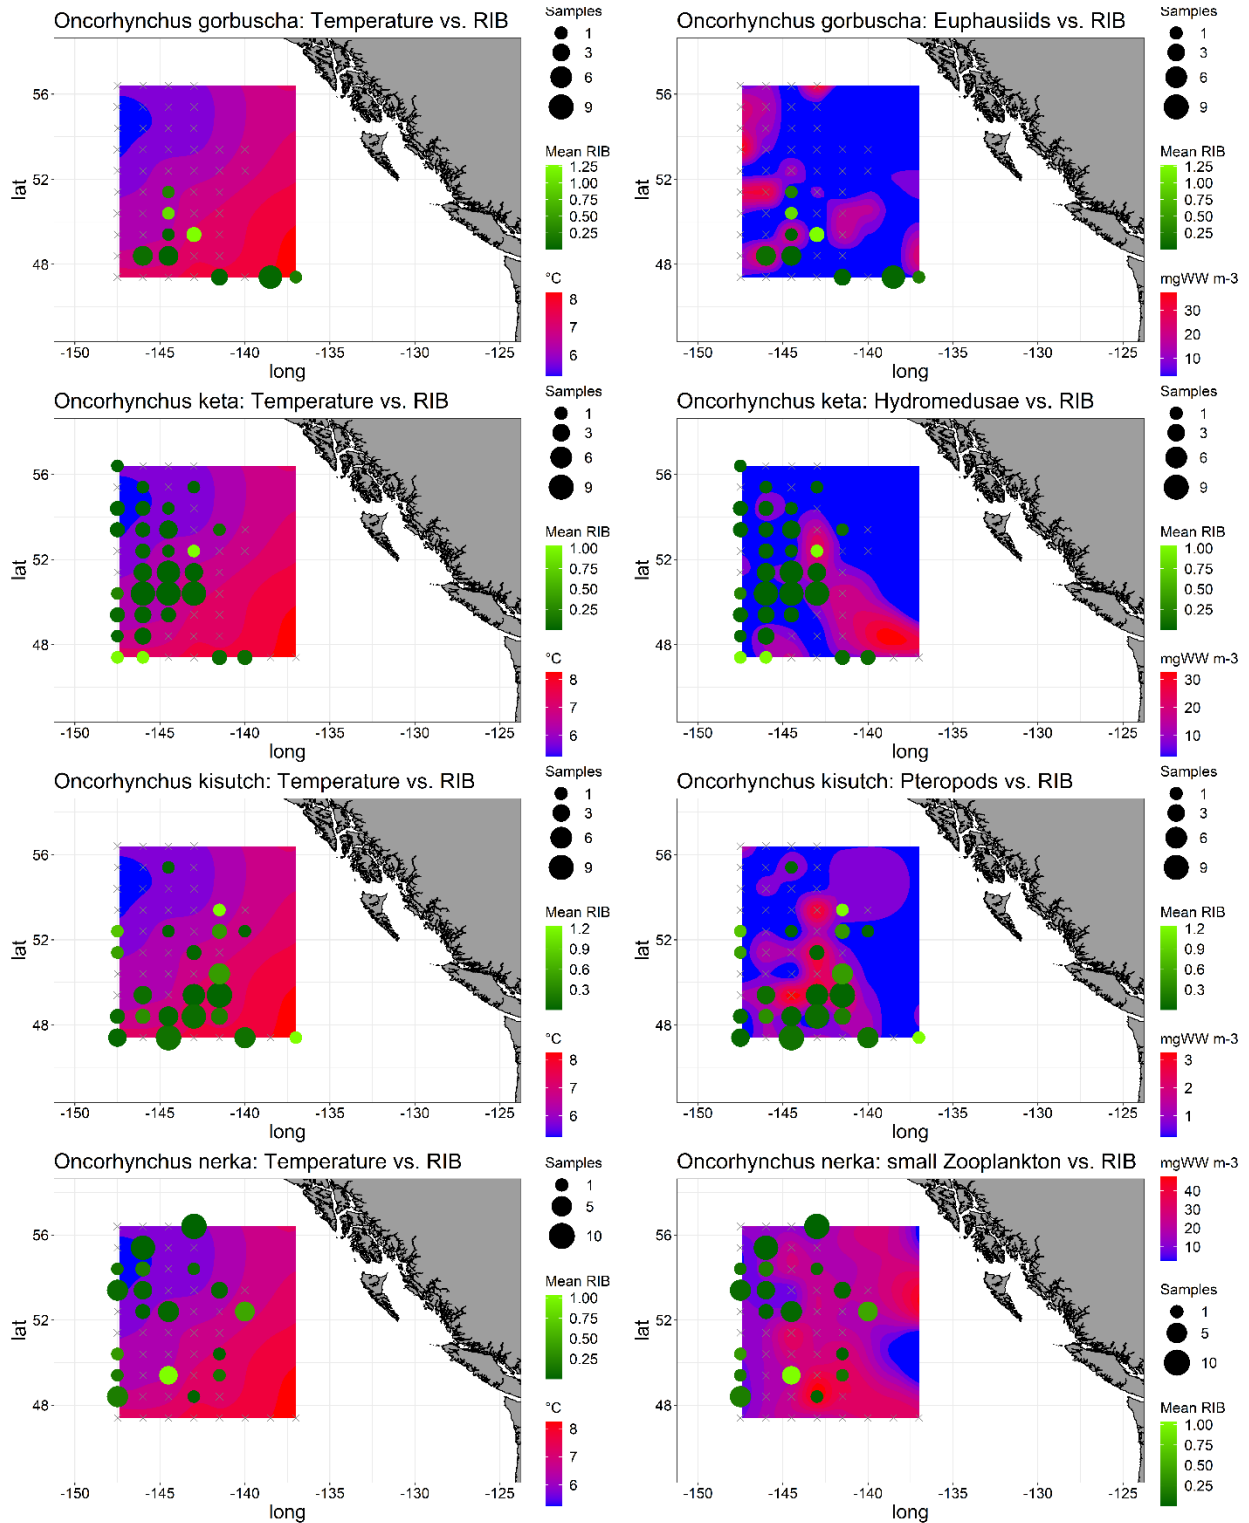

Supplementary Figure 10: Spatial correlation of mean relative infection burden (RIB) at site of capture with temperature and primary prey of salmon species in the Gulf of Alaska during the winter 2019.

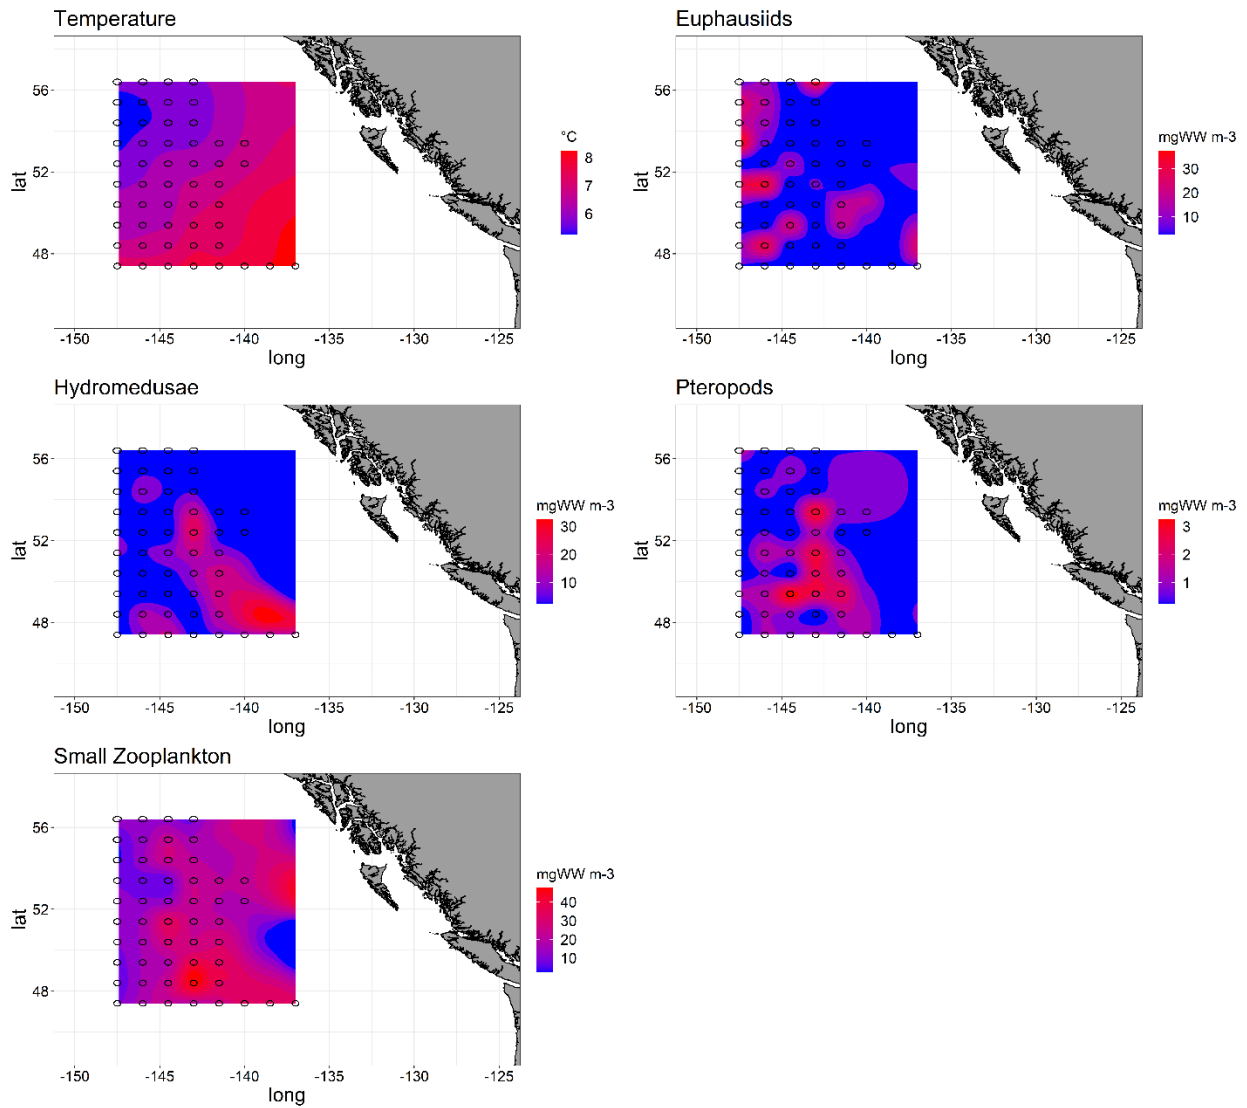

Supplementary Figure 11: Changes in oceanographic variables experienced by salmon. Observed oceanographic gradients across the study area with circles around the sampling sites indicating the area the samples salmon could have travelled from within the past 24h based on data by Ogura and Ishida, 1992 and 1995. Radius of the circle is 15.1km and represents the net 24h travel distance of salmon in the study area.

## Supplementary materials and methods:

### Histopathology

Gills, skeletal muscle, spleen, liver, heart, anterior and posterior kidney, pyloric caeca, and brain were fixed in 10% neutral buffered formalin. For salmon showing infection with selected high load agents, histopathological samples were prepared to visualize and localize lesions and pathogens by *in-situ* hybridization (ISH). Samples were dehydrated through an alcohol gradient, embedded in paraffin, cut at 3.5 µm, and stained with ematoxylin and eosin (H&E) for morphological evaluation by bright field microscopy. To confirm the presence and tissue infection of *Ichthyophonus hoferi*, it was visualized using an RNAscope probe (Advanced Cell Diagnostics, Newark, California, USA - F-I.hoferi-18S-rRNA Cat No. 823981). A housekeeping gene RNAscope probe (Advanced Cell Diagnostics, Newark, California, USA - Om-ppib Cat No. 540651) was utilized as a positive control. Samples with no detectable infection from the Fluidigm screen were used as negative controls. Signal amplification was performed with RNAscope 2.5 HD assay (Advanced Cell Diagnostics, Newark, California, USA, catalog No. 322350), according to the manufacturer's instructions, and followed by counterstaining with Gill's hematoxylin.
